# Supplementary material for: The Clinical Impact of Metagenomic Next-Generation Sequencing (mNGS) Test in Hospitalized Patients with Suspected Sepsis: A Multicenter Prospective Study
Source: MDPI journal article supplement (doi:10.3390/diagnostics13020323), 2023-01-16
Supplement: s1 [file s1]

**Supplemental Table S2.** Univariate linear regression of inflammatory factors level and reads of responsible pathogens in mNGS reports.

| Inflammatory Factor | P-value | B (95% CI)            | R-Square |
|---------------------|---------|-----------------------|----------|
| IL-1 $\beta$        | 0.024   | 0.349 (0.051, 0.647)  | 0.182    |
| Eotaxin             | 0.004   | 0.465 (0.157, 0.773)  | 0.247    |
| IFN- $\alpha$       | < 0.001 | 2.629 (1.450, 3.809)  | 0.436    |
| HGF                 | 0.761   | 0.039 (-0.221, 0.299) | 0.003    |
| TNF- $\alpha$       | < 0.001 | 0.905 (0.503, 1.307)  | 0.432    |
| IL-9                | 0.149   | 0.415 (-0.158, 0.988) | 0.070    |

Abbreviations: mNGS, metagenomic next-generation sequencing; B, standardized linear regression coefficient; IL, interleukin; IFN, interferon; HGF, hepatocyte growth factor; TNF, tumor necrosis factor.
