# Supplementary material for: The Clinical Impact of Metagenomic Next-Generation Sequencing (mNGS) Test in Hospitalized Patients with Suspected Sepsis: A Multicenter Prospective Study
Source: MDPI journal article supplement (doi:10.3390/diagnostics13020323), 2023-01-16
Supplement: s1 [file s1]

**Supplemental Table S3.** Univariate linear regression of inflammatory factors level and reads of pathogens in sepsis group.

| Inflammatory factor | P-value | B (95% CI)           | R-square |
|---------------------|---------|----------------------|----------|
| IL-1 $\beta$        | 0.070   | 0.342(-0.031, 0.714) | 0.171    |
| Eotaxin             | 0.019   | 0.519(0.097, 0.941)  | 0.259*   |
| IFN- $\alpha$       | 0.002   | 2.822(1.209, 4.435)  | 0.429*   |
| HGF                 | 0.984   | 0.003(-0.343, 0.349) | 0.000    |
| TNF- $\alpha$       | 0.002   | 0.958(0.419, 1.496)  | 0.437*   |
| IL-9                | 0.077   | 0.782(-0.095, 1.658) | 0.155    |

Abbreviations: B, standardized linear regression coefficient; IL, interleukin; IFN, interferon; HGF, hepatocyte growth factor; TNF, tumor necrosis factor. \* represents the significance of R value < 0.05.
