# Supplementary material for: The Clinical Impact of Metagenomic Next-Generation Sequencing (mNGS) Test in Hospitalized Patients with Suspected Sepsis: A Multicenter Prospective Study
Source: MDPI journal article supplement (doi:10.3390/diagnostics13020323), 2023-01-16
Supplement: s1 [file s1]

**Supplemental Table S1.** The diagnosis efficacy comparison between mNGS and blood culture in different subgroups.

| Subgroups                           | mNGS test   |             | Blood culture |             |
|-------------------------------------|-------------|-------------|---------------|-------------|
|                                     | Sensitivity | Specificity | Sensitivity   | Specificity |
| Age                                 |             |             |               |             |
| > 65 yrs                            | 90.74%*     | 90.20%      | 37.78%        | 95.00%      |
| ≤ 65 yrs                            | 90.43%**    | 98.68%      | 35.00%        | 94.44%      |
| Gender                              |             |             |               |             |
| Male                                | 90.48%**    | 94.32%      | 36.05%        | 95.45%      |
| Female                              | 90.70%**    | 97.44%      | 35.90%        | 92.31%      |
| Shock index                         |             |             |               |             |
| > 1.0                               | 89.09%**    | 100.00%     | 34.00%        | 96.30%      |
| ≤ 1.0                               | 91.40%**    | 93.18%      | 37.33%        | 93.85%      |
| Pulmonary infection                 |             |             |               |             |
| Yes                                 | 92.0%**     | 92.68%      | 32.50%        | 92.59%      |
| No                                  | 87.50%**    | 100%        | 42.22%        | 97.36%      |
| Bloodstream infection               |             |             |               |             |
| Yes                                 | 96.15%*     | 92.86%      | 56.00%        | 90.91%      |
| No                                  | 89.34%**    | 95.58%      | 31.00%        | 95.06%      |
| Surgery/trauma history <sup>a</sup> |             |             |               |             |
| Yes                                 | 95.83%**    | 97.78%      | 34.88%        | 97.22%      |
| No                                  | 88.88%**    | 93.90%      | 36.59%        | 92.86%      |



|                              |          |        |        |        |
|------------------------------|----------|--------|--------|--------|
| Time from infection onset    |          |        |        |        |
| to enrollment                |          |        |        |        |
| ≤ 5 days                     | 91.23%** | 96.30% | 26.92% | 95.45% |
| > 5 days                     | 89.77%** | 97.18% | 41.67% | 93.62% |
| Invasive operations before   |          |        |        |        |
| infection onset <sup>b</sup> |          |        |        |        |
| Yes                          | 89.61%** | 98.53% | 42.19% | 91.53% |
| No                           | 91.54%** | 91.53% | 29.51% | 97.67% |
| Fever                        |          |        |        |        |
| Yes                          | 88.68%** | 95.65% | 40.45% | 95.24% |
| No                           | 95.24%** | 94.29% | 25.00% | 93.10% |
| Altered mental status        |          |        |        |        |
| Yes                          | 86.67%** | 95.00% | 41.54% | 91.89% |
| No                           | 94.37%** | 95.52% | 29.31% | 96.36% |
| Antibiotics use before       |          |        |        |        |
| enrollment <sup>c</sup>      |          |        |        |        |
| Yes                          | 90.70%** | 94.96% | 34.58% | 94.05% |
| No                           | 89.47%*  | 100%   | 44.44% | 100%   |
| ICU administration           |          |        |        |        |
| Yes                          | 90.43%** | 97.89% | 35.58% | 94.37% |
| No                           | 90.91%*  | 87.50% | 38.10% | 95.24% |
| Sepsis                       |          |        |        |        |



|     |          |        |        |        |
|-----|----------|--------|--------|--------|
| Yes | 89.13%** | 98.57% | 34.15% | 93.88% |
| No  | 92.86%** | 91.23% | 39.53% | 95.35% |

---

a: surgery/trauma history within 3 months before enrollment; b: invasive procedures include punctures and drainages, tracheal intubation, urinary catheterization, arteriovenous catheterization, and superficial vein indwelling needle puncturing; c: antibiotics application within 2 weeks before enrollment.

Abbreviations: mNGS, metagenomic next-generation sequencing; ICU, Intensive care unit.

\*P < 0.05, mNGS vs blood culture; \*\*P < 0.001, mNGS vs blood culture.
