# Supplementary material for: The Clinical Impact of Metagenomic Next-Generation Sequencing (mNGS) Test in Hospitalized Patients with Suspected Sepsis: A Multicenter Prospective Study
Source: Diagnostics (Basel). 2023 Jan 16;13(2):323. doi: 10.3390/diagnostics13020323 (PMC9857658; doi:10.3390/diagnostics13020323)
Supplement: Supplementary file 1 [file diagnostics-13-00323-s001.zip]

Archive with 5 entries (5 files):
- Supplemental file S1.pdf
- Supplemental file S2.pdf
- Supplemental file S3.pdf
- Supplemental file S4.pdf
- Supplemental file S5.pdf
